# Supplementary material for: Controlled release of vancomycin from 3D porous graphene-based composites for dual-purpose treatment of infected bone defects
Source: Royal Society of Chemistry journal article supplement (doi:10.1039/c6ra26062d), 2017-01-01
Supplement: c6ra26062d1.pdf [file c6ra26062d1.pdf]

## Supporting Information for

### Controlled release of vancomycin from 3D porous graphene-based composites for dual-purpose treatment of infected bone defect

*Weizong Weng<sup>a§</sup>, Wei Nie<sup>b§</sup>, Qirong Zhou<sup>a</sup>, Xiaojun Zhou<sup>b</sup>, Liehu Cao<sup>a</sup>, Fang Ji<sup>a\*</sup>, Jin Cui<sup>a</sup>, Chuanglong He<sup>b\*</sup>, Jiacan Su<sup>a\*</sup>*

<sup>a</sup> Department of Orthopaedics Trauma, Changhai Hospital, Second Military Medical University, No.168 Changhai Road, Shanghai 200433, China.

<sup>b</sup> College of Chemistry, Chemical Engineering and Biotechnology; State Key Laboratory for Modification of Chemical Fibers and Polymer Materials, Donghua University, 2999 North Renmin Road, Shanghai 201620, China.

\*Corresponding authors.

E-mail address: [chjifang1962@126.com](mailto:chjifang1962@126.com) (Prof. F Ji);

[drsujacan@163.com](mailto:drsujacan@163.com) (Prof. JC Su);

[hcl@dhu.edu.cn](mailto:hcl@dhu.edu.cn) (Prof. CL He)

§These authors contribute equally to this work

This PDF file includes:

Supporting Information Note (Pages S2)

Supplementary Figs.1 to 5 (Pages S3-S6)

## **Supporting Information Notes**

Verification of the rabbit infected bone defect model was conducted based on the WBC and CRP variation, wound observation, X-ray photograph and histological changes. Three rabbits of each group were randomly euthanized at 2 weeks after the modelling surgery, and the bone tissue slices were retrieved and fixed in 4% paraformaldehyde, dehydrated in a gradient series of ethanol solutions (70%, 75%, 80%, 85%, 90%, 95%, 100%) for 24 h, and embedded in polymethylmethacrylate. Serial sagittal sections with a thickness of 100  $\mu\text{m}$  were obtained using a microtome (EXAKT310, Germany) and then polished to a thickness of approximately 40  $\mu\text{m}$ . The sections of undecalcified specimens were then subjected to haematoxylin and eosin (H&E) staining for observation. Other harvest bone splices were soaked in PBS, and the resulting suspension was added to the agar plate, cultured overnight for observation of bacteria colony formation.

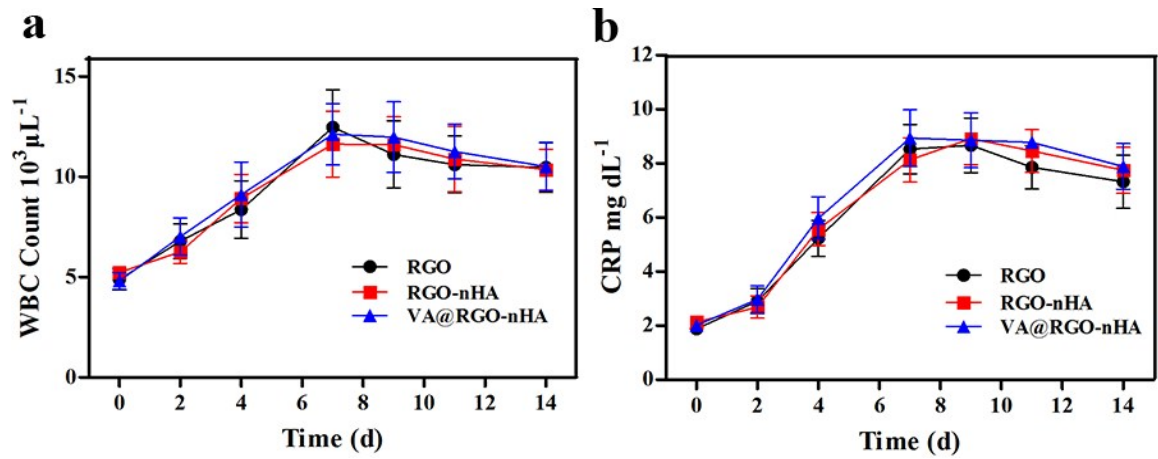

**Fig. S1** Obviously increased infection indicators of rabbits underwent modelling surgery in group RGO, RGO-nHA and VA@RGO-nHA. (a) Changes in WBC count. (b) Changes of CRP level after modelling surgery.

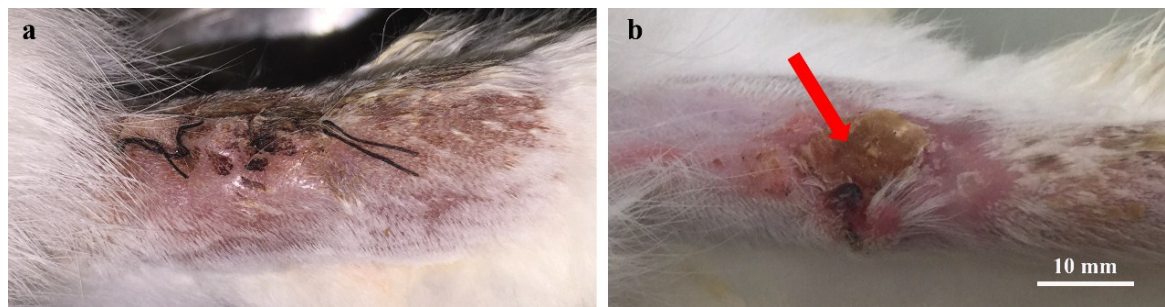

**Fig. S2** Digital photographs of rabbit forearms after modelling surgery. (a) 1 week after modelling surgery, swelling of the wound was observed due to established infection and inflammation. (b) 2 weeks after modelling surgery, more obvious symptoms was observed with soft tissue ulceration and fester from the open wound. Red arrow indicates ulcerated soft tissue and abscess pyogenic fluids.

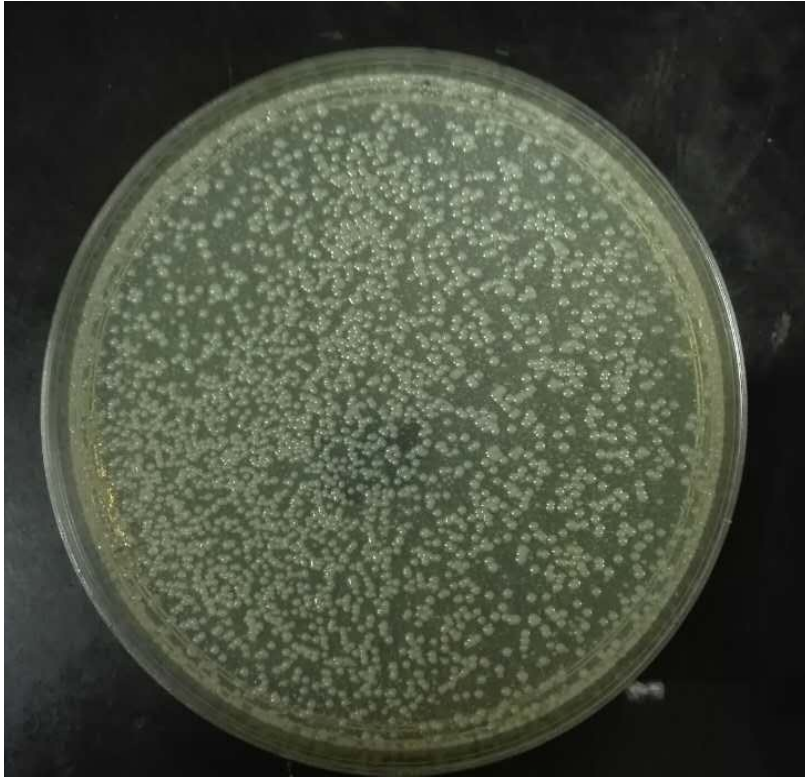

**Fig. S3** Bacterial culture of the harvested bone marrow from the rabbit models revealed massive *S. aureus* bacterial colony formation on the agar plate.

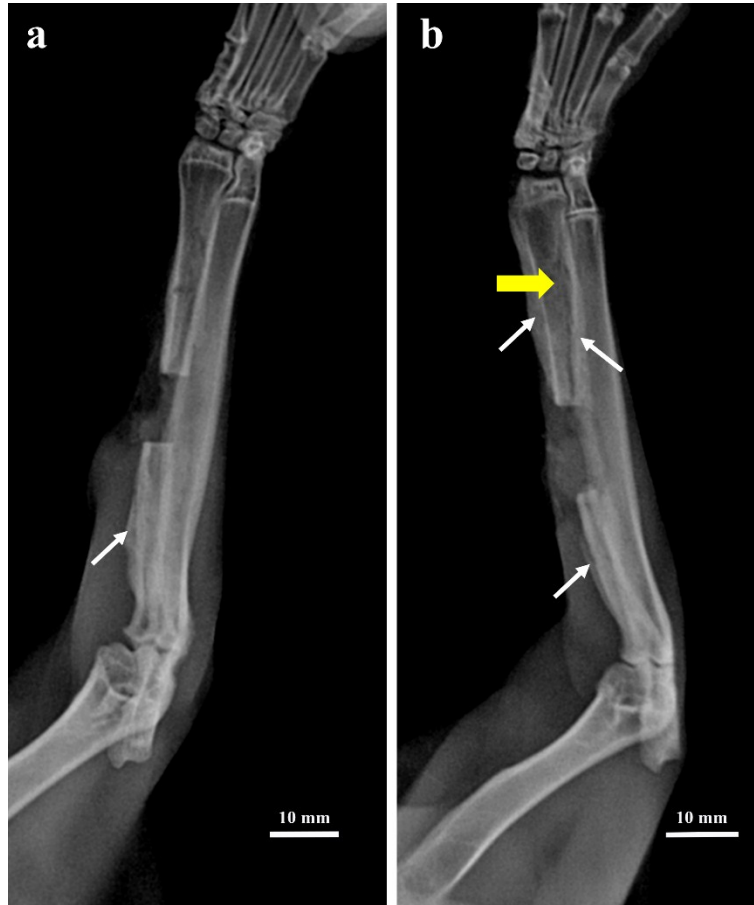

**Fig. S4** X-ray photographs of the rabbit forearms (a) 1 week after modelling surgery and (b) 2 weeks after modelling surgery. White arrows indicate thickened periosteal reaction and sequestrum due to inflammatory response, and yellow arrows indicate disorganized and inflammatory bone marrow due to infection.

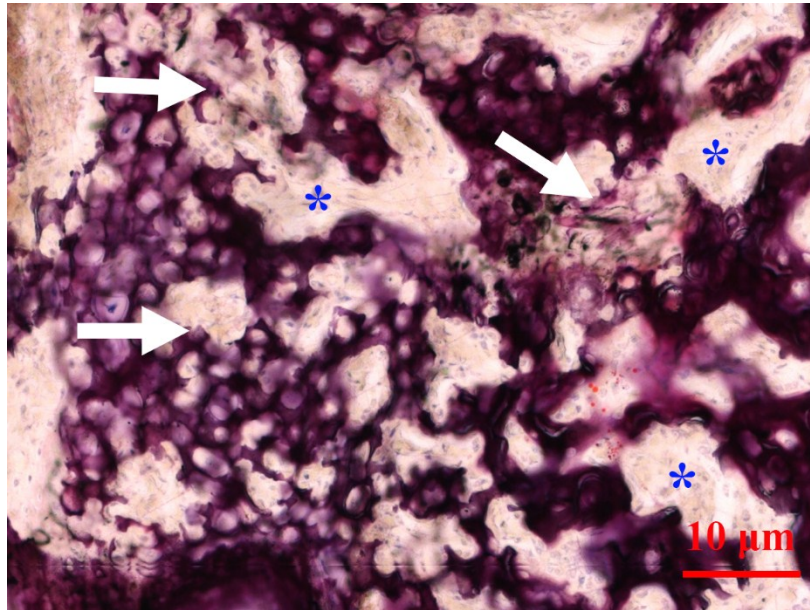

**Fig. S5** H&E staining of undecalcificated bones slices from the rabbit models demonstrated inflammation and bone destruction due to bacteria propagation. Asterisks indicates inflammation cells infiltration, and bold arrows indicates leisions of the affected bone trabecula. Scale bar = 10  $\mu\text{m}$ .
